# Supplementary material for: HIV Quasispecies Dynamics during Pro-Active Treatment Switching: Impact on Multi-Drug Resistance and Resistance Archiving in Latent Reservoirs
Source: PubMed Central journal article supplement (PMC3063788; doi:10.1371/journal.pone.0018204), 2011-03-24

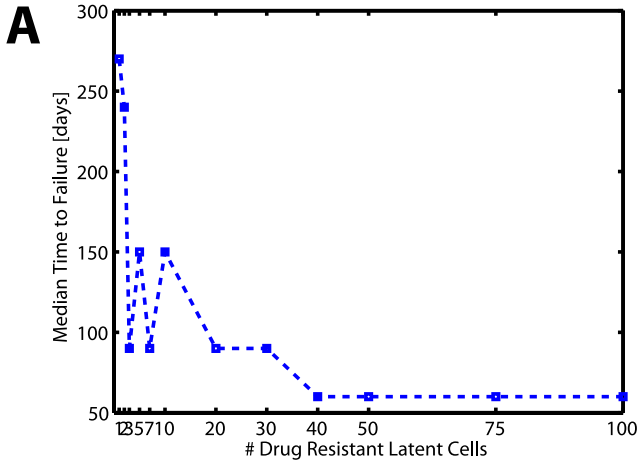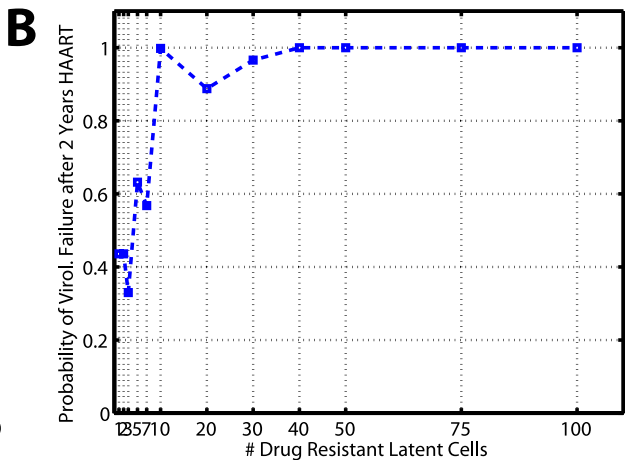

Supplement: pone.0018204.s001.pdf [file pone.0018204.s001.pdf]
