# Supplementary material for: HIV Quasispecies Dynamics during Pro-Active Treatment Switching: Impact on Multi-Drug Resistance and Resistance Archiving in Latent Reservoirs
Source: PubMed Central journal article supplement (PMC3063788; doi:10.1371/journal.pone.0018204), 2011-03-24
Supplement: pone.0018204.s002.pdf [file pone.0018204.s002.pdf]

**Table S1. Determination of relevant parameter space for further investigation.**

| Par. set | $(1 - \eta)$ | $s$  | failure rate       | relevant |
|----------|--------------|------|--------------------|----------|
| R1       | 0.7          | 0.3  | 22% ( $\pm 6.4$ )  | yes      |
| R2       | 0.7          | 0.25 | 22% ( $\pm 6.4$ )  | yes      |
| R3       | 0.7          | 0.2  | 53% ( $\pm 9.8$ )  | yes      |
| R4       | 0.75         | 0.25 | 3% ( $\pm 3.3$ )   | yes      |
| R5       | 0.75         | 0.2  | 18% ( $\pm 7.5$ )  | yes      |
| R6       | 0.8          | 0.2  | 2% ( $\pm 2.7$ )   | yes      |
| R7       | 0.8          | 0.15 | 21% ( $\pm 8$ )    | yes      |
| R8       | 0.8          | 0.1  | 51% ( $\pm 9.8$ )  | yes      |
| R9       | 0.85         | 0.15 | 5% ( $\pm 4.3$ )   | yes      |
| R10      | 0.85         | 0.1  | 14% ( $\pm 6.8$ )  | yes      |
| R11      | 0.85         | 0.05 | 64% ( $\pm 9.4$ )  | yes      |
| R12      | 0.9          | 0.05 | 2% ( $\pm 2.7$ )   | yes      |
| N13      | 0.7          | 0.15 | 90% ( $\pm 5.9$ )  | no       |
| N14      | 0.7          | 0.1  | 100% (-)           | no       |
| N15      | 0.7          | 0.05 | 100% (-)           | no       |
| N16      | 0.75         | 0.3  | 1% ( $\pm 2$ )     | no       |
| N17      | 0.75         | 0.15 | 68% ( $\pm 9.14$ ) | no       |
| N18      | 0.75         | 0.1  | 99% ( $\pm 1$ )    | no       |
| N19      | 0.75         | 0.05 | 100% (-)           | no       |
| N20      | 0.8          | 0.3  | 0% (-)             | no       |
| N21      | 0.8          | 0.25 | 0% (-)             | no       |
| N22      | 0.8          | 0.05 | 100% (-)           | no       |
| N23      | 0.85         | 0.3  | 0% (-)             | no       |
| N24      | 0.85         | 0.25 | 0% (-)             | no       |
| N25      | 0.85         | 0.2  | 0% (-)             | no       |
| N26      | 0.9          | 0.3  | 0% (-)             | no       |
| N27      | 0.9          | 0.25 | 0% (-)             | no       |
| N28      | 0.9          | 0.2  | 0% (-)             | no       |
| N29      | 0.9          | 0.15 | 0% (-)             | no       |
| N30      | 0.9          | 0.1  | 0% (-)             | no       |
| N31      | 0.95         | 0.3  | 0% (-)             | no       |
| N32      | 0.95         | 0.25 | 0% (-)             | no       |
| N33      | 0.95         | 0.2  | 0% (-)             | no       |
| N34      | 0.95         | 0.15 | 0% (-)             | no       |
| N35      | 0.95         | 0.1  | 0% (-)             | no       |
| N36      | 0.95         | 0.05 | 0% (-)             | no       |

We assessed virological failure rates after one year of triple drug therapy for varying values of efficacy ( $1 - \eta(wt, j)$ ) of drug  $j$  against the wildtype  $wt$  and selective disadvantage per mutation  $s$ . All other parameters have been taken from Table 1. A parameter combination (in terms of  $(1 - \eta(wt, j))$  and  $s$ ) was considered relevant, if it produced realistic failure rates after one year of therapy [1]. Confidence ranges are indicated in brackets and were calculated using Greenwood's formula. Each condition has been evaluated by 100 stochastic deterministic simulations.

## References

1. Riddler SA, Haubrich R, DiRienzo AG, Peeples L, Powderly WG, et al. (2008) Class-sparing regimens for initial treatment of HIV-1 infection. *N Engl J Med* 358: 2095–2106.
