# Supplementary material for: HIV Quasispecies Dynamics during Pro-Active Treatment Switching: Impact on Multi-Drug Resistance and Resistance Archiving in Latent Reservoirs
Source: PubMed Central journal article supplement (PMC3063788; doi:10.1371/journal.pone.0018204), 2011-03-24
Supplement: pone.0018204.s008.pdf [file pone.0018204.s008.pdf]

| Index |     | wt     | Mut1     | Mut2     | Mut12     |
|-------|-----|--------|----------|----------|-----------|
| 1     | TU  |        |          |          |           |
| 2     | MU  |        |          |          |           |
| 3     |     | T1(wt) |          |          |           |
| 4     |     | T2(wt) |          |          |           |
| 5     |     | TL(wt) |          |          |           |
| 6     |     | M1(wt) |          |          |           |
| 7     |     | M2(wt) |          |          |           |
| 8     |     | VI(wt) |          |          |           |
| 9     |     |        | T1(mut1) |          |           |
| 10    |     |        | T2(mut1) |          |           |
| 11    |     |        | TL(mut1) |          |           |
| 12    |     |        | M1(mut1) |          |           |
| 13    |     |        | M2(mut1) |          |           |
| 14    |     |        | VI(mut1) |          |           |
| 15    |     |        |          | T1(mut2) |           |
| 16    |     |        |          | T2(mut2) |           |
| 17    |     |        |          | TL(mut2) |           |
| 18    |     |        |          | M1(mut2) |           |
| 19    |     |        |          | M2(mut2) |           |
| 20    |     |        |          | VI(mut2) |           |
| 21    |     |        |          |          | T1(mut12) |
| 22    |     |        |          |          | T2(mut12) |
| 23    |     |        |          |          | TL(mut12) |
| 24    |     |        |          |          | M1(mut12) |
| 25    |     |        |          |          | M2(mut12) |
| 26    |     |        |          |          | VI(mut12) |
| 27    | VNI |        |          |          |           |
